# Supplementary material for: Sequence based prediction of enhancer regions from DNA random walk
Source: PubMed Central journal article supplement (PMC6206163; doi:10.1038/s41598-018-33413-y), 2018-10-29
Supplement: 41598_2018_33413_MOESM1_ESM.pdf [file 41598_2018_33413_MOESM1_ESM.pdf]

# Sequence based prediction of enhancer regions from DNA random walk

Anand Pratap Singh<sup>1</sup>, Sarthak Mishra<sup>1</sup>, Suraiya Jabin<sup>1</sup>

<sup>1</sup>Department of Computer Science, Jamia Millia Islamia, Jamia Nagar, New Delhi–110025, New Delhi, India. Correspondence and requests for materials should be addressed to S.J.

(email: [sjabin@jmi.ac.in](mailto:sjabin@jmi.ac.in))

## Supplementary Information S1:

This supplementary information file briefly describes links for all data sources (positive and negative enhancer sequences), python scripts used for feature extraction, along with steps for creation of Training Data and Test data.

### I) Sequence downloaded from VISTA Enhancer browser for human genome

Source :

<https://enhancer.lbl.gov/cgi-bin/imagedb3.pl?search.org=Human&keyword=&form=searchGene&action=search&experiment=1>

### II) Negative Set generated using gkmSVM genNullSeqs function

Source:

<https://cran.r-project.org/web/packages/gkmSVM/index.html>

Example:

```
genNullSeqs('posSet.bed', nMaxTrials=10, xfold=8, genomeVersion='hg19', outputPosFastaFN='pos29june.fa', outputBedFN='ctcfneg_1x.bed', outputNegFastaFN='1x29june.fa')
```

### III) Feature vector is created using kmer.py and measure.py

Python scripts for extracting K-mer and Non-linear features are given below so that a reader can use these scripts to prepare feature vectors from sequences of his own interest.

#### 1. Python script for extracting kmer features (kmer.py):

```
#####  
# Generate K-mer feature vector  
# Input: Sequence in multi fasta format  
# Output: Feature vector in comma seprated file  
#  
# Usage (on command line prompt): python3 kmer.py <sequence file>  
e.g. ctcfneg_1x29june.fa  
#####  
  
# generate_kmer function return list of permutation possible till n position.  
def generate_kmer(n):
```

```

kmer = [ ]
for k in range(1,n+1):
    kmer.extend([''.join(i) for i in product('ATGC',repeat=k)])
return kmer

# calculate frequency of each permutation in the sequence
# s : sequence
# kmer : permutations of ATGC till position n
def calculate_freq(s,kmer):
    freq = [ ]
    for i in kmer:
        freq.append(s.count(i))
    return freq

# Generating frequency matrix of kmers for each sequence and storing in dataframe.
sequence = [ ]
for record in SeqIO.parse(sys.argv[1],"fasta"):
    sequence.append(record.seq.upper())

kmer = generate_kmer(6)
df = pd.DataFrame([calculate_freq(i,kmer) for i in sequence])
df.columns = kmer

# writing output to kmer_data.csv file
df.to_csv("kmer_data.csv")

```

## **2. Python script for extracting Non-linear features (measure.py):**

```

#####
# Generate Nonlinear feature vector
# Input : DNA Sequence in multifasta format
# Output : Non-linear feature vector in comma separated file
#
# Usage (on command line prompt): python3 measure.py <sequence file> <output file>
#####

import re
import sys
import nolds
import numpy as np
import pandas as pd
from Bio import SeqIO

# read sequences from fasta format
# s: filename
def read_seq(s):
    p = re.compile(r'>.*\n')
    d = p.split(open(s).read(),maxsplit=0)
    d = [i.replace('\n','') for i in d]
    return d[1:]

```

```

# generate walk according to purine pyrimidine model
# x : sequence
def lwalk(x):
    disp = []
    count = 0
    for i in x:
        if 'A' == i or 'G' == i:
            count += 1
        elif 'T' == i or 'C' == i:
            count -= 1
        disp = np.append(disp,count)
    return disp

# calculate autocorrelation of sequence x with some lag
def autocorrelation(x,lag):
    i = pd.Series(x)
    return pd.Series.autocorr(i,lag)

# calculate ratio value number to time series length for sequence x
def ratio_value_number_to_time_series_length(x):
    if len(x) == 0:
        return np.nan
    return len(set(x))/len(x)

# calculate all feature for each sequence in s
# s: list of sequences
def load_feature(s):
    rw = [lwalk(i) for i in s]
    sd = [np.std(i) for i in rw]
    dfa = [nolds.dfa(i) for i in rw]
    hurst = [nolds.hurst_rs(i) for i in rw]
    sampen = [nolds.sampen(i) for i in rw]
    ac = [autocorrelation(i,100) for i in rw]
    rvntsl = [ratio_value_number_to_time_series_length(i) for i in rw]
    ac_200 = [autocorrelation(i,200) for i in rw]
    ac_300 = [autocorrelation(i,300) for i in rw]
    lyapr = [nolds.lyap_r(i) for i in rw]
    inpv = pd.DataFrame([sd,dfa,hurst,sampen,ac,rvntsl,ac_200,ac_300,lyapr])
    return inpv.transpose()

# reading sequence file
sequence = []
for record in SeqIO.parse(sys.argv[1],"fasta"):
    sequence.append(record.seq.upper())

# generating feature vector and saving in comma seprated file
df = load_feature(sequence)
df.columns = ['sd','dfa','hurst','sampen','ac','rvntsl','ac_200','ac_300','lyapr']
df.to_csv(sys.argv[2])

```

## IV ) Steps for preparation of Test Dataset:

- 1) Sequence Data for histone marks are downloaded from ENCODE project
- 2) Overlapped sequence between H3K4me1 and H3K27ac1 marks are calculated using bedtools for respective cells
- 3) From overlapped bed file, sequences are extracted using bedtools from hg19 genome (downloaded from ucsc)
- 4) Kmer.py and measure.py are used to extract features from the sequences
- 5) Performance of model is checked on this test data (separate from training data)

Sources:

<https://www.encodeproject.org/files/ENCFF044SOD/@@download/ENCFF044SOD.bed.gz>

T Cell H3K27ac

<https://www.encodeproject.org/files/ENCFF343VOU/@@download/ENCFF343VOU.bed.gz>

Natural Killer Cell H3K4me1

<https://www.encodeproject.org/files/ENCFF407DJB/@@download/ENCFF407DJB.bed.gz>

Natural Killer Cell H3K27ac

<https://www.encodeproject.org/files/ENCFF755QEH/@@download/ENCFF755QEH.bed.gz>

B Cell H3K27ac

<https://www.encodeproject.org/files/ENCFF579EPE/@@download/ENCFF579EPE.bed.gz>

B Cell H3K4me1

<https://www.encodeproject.org/files/ENCFF259HOW/@@download/ENCFF259HOW.bed.gz>

Human Genome Hg19

<http://hgdownload.cse.ucsc.edu/goldenPath/hg19/bigZips/hg19.2bit>

## Supplementary Information S2:

### A Complete list of 5468 features extracted for the prepared Training/Test dataset:

A,T,G,C,AA,AT,AG,AC,TA,TT,TG,TC,GA,GT,GG,GC,CA,CT,CG,CC,AAA,AAT,AAG,AAC,A  
TA,ATT,ATG,ATC,AGA,AGT,AGG,AGC,ACA,ACT,ACG,ACC,TAA,TAT,TAG,TAC,TTA,TT  
T,TTG,TTT,TGA,TGT,TGG,TGC,TCA,TCT,TCG,TCC,GAA,GAT,GAG,GAC,GTA,GTT,GTG,G  
TC,GGA,GGT,GGG,GGC,GCA,GCT,GCG,GCC,CAA,CAT,CAG,CAC,CTA,CTT,CTG,CTC,CG  
A,CGT,CGG,CGC,CCA,CCT,CCG,CCC,AAAA,AAAT,AAAG,AAAC,AATA,AATT,AATG,AA  
TC,AAGA,AAGT,AAGG,AAGC,AACA,AACT,AACG,AACC,ATAA,ATAT,ATAG,ATAC,ATT  
A,ATTT,ATTG,ATTC,ATGA,ATGT,ATGG,ATGC,ATCA,ATCT,ATCG,ATCC,AGAA,AGAT,A  
GAG,AGAC,AGTA,AGTT,AGTG,AGTC,AGGA,AGGT,AGGG,AGGC,AGCA,AGCT,AGCG,A  
GCC,ACAA,ACAT,ACAG,ACAC,ACTA,ACTT,ACTG,ACTC,ACGA,ACGT,ACGG,ACGC,AC  
CA,ACCT,ACCG,ACCC,TAAA,TAAT,TAAG,TAAC,TATA,TATT,TATG,TATC,TAGA,TAGT,  
TAGG,TAGC,TACA,TACT,TACG,TACC,TTAA,TTAT,TTAG,TTAC,TTTA,TTTT,TTTG,TTTC  
,TTGA,TTGT,TTGG,TTGC,TTCA,TTCT,TTCG,TTCC,TGAA,TGAT,TGAG,TGAC,TGTA,TGT  
T,TGTG,TGTC,TGGA,TGGT,TGGG,TGGC,TGCA,TGCT,TGCG,TGCC,TCAA,TCAT,TCAG,T  
CAC,TCTA,TCTT,TCTG,TCTC,TCGA,TCGT,TCGG,TCGC,TCCA,TCCT,TCCG,TCCC,GAAA,  
GAAT,GAAG,GAAC,GATA,GATT,GATG,GATC,GAGA,GAGT,GAGG,GAGC,GACA,GACT,  
GACG,GACC,GTAA,GTAT,GTAG,GTAC,GTTA,GTTT,GTTG,GTTC,GTGA,GTGT,GTGG,GT  
GC,GTCA,GTCT,GTTC,GTCC,GGAA,GGAT,GGAG,GGAC,GGTA,GGTT,GGTG,GGTC,GGG  
A,GGGT,GGGG,GGGC,GGCA,GGCT,GGCG,GGCC,GCAA,GCAT,GCAG,GCAC,GCTA,GCTT  
,GCTG,GCTC,GCGA,GCGT,GCGG,GCGC,GCCA,GCCT,GCCG,GCCC,CAAA,CAAT,CAAG,C  
AAC,CATA,CATT,CATG,CATC,CAGA,CAGT,CAGG,CAGC,CACA,CACT,CACG,CACC,CT  
AA,CTAT,CTAG,CTAC,CTTA,CTTT,CTTG,CTTC,CTGA,CTGT,CTGG,CTGC,CTCA,CTCT,C  
TCG,CTCC,CGAA,CGAT,CGAG,CGAC,CGTA,CGTT,CGTG,CGTC,CGGA,CGGT,CGGG,CG  
GC,CGCA,CGCT,CGCG,CGCC,CCAA,CCAT,CCAG,CCAC,CCTA,CCTT,CCTG,CCTC,CCGA,  
CCGT,CCGG,CCGC,CCCA,CCCT,CCCG,CCCC,AAAAA,AAAAT,AAAAG,AAAAC,AAATA,  
AAATT,AAATG,AAATC,AAAGA,AAAGT,AAAGG,AAAGC,AAACA,AAACT,AAACG,AAA  
CC,AATAA,AATAT,AATAG,AATAC,AATTA,AATTT,AATTG,AATTC,AATGA,AATGT,AA  
TGG,AATGC,AATCA,AATCT,AATCG,AATCC,AAGAA,AAGAT,AAGAG,AAGAC,AAGTA,  
AAGTT,AAGTG,AAGTC,AAGGA,AAGGT,AAGGG,AAGGC,AAGCA,AAGCT,AAGCG,AAG  
CC,AACAA,AACAT,AACAG,AACAC,AACTA,AACTT,AACTG,AACTC,AACGA,AACGT,A  
ACGG,AACGC,AACCA,AACCT,AACCG,AACCC,ATAAA,ATAAT,ATAAG,ATAAC,ATATA,  
ATATT,ATATG,ATATC,ATAGA,ATAGT,ATAGG,ATAGC,ATACA,ATACT,ATACG,ATACC  
,ATTA,ATTAT,ATTAG,ATTAC,ATTTA,ATTTT,ATTTG,ATTTT,ATTGA,ATTGT,ATTGG,A  
TTGC,ATTCA,ATTCT,ATTCG,ATTCC,ATGAA,ATGAT,ATGAG,ATGAC,ATGTA,ATGTT,A  
TGTG,ATGTC,ATGGA,ATGGT,ATGGG,ATGGC,ATGCA,ATGCT,ATGCG,ATGCC,ATCAA,  
ATCAT,ATCAG,ATCAC,ATCTA,ATCTT,ATCTG,ATCTC,ATCGA,ATCGT,ATCGG,ATCGC,  
ATCCA,ATCCT,ATCCG,ATCCC,AGAAA,AGAAT,AGAAG,AGAAC,AGATA,AGATT,AGAT  
G,AGATC,AGAGA,AGAGT,AGAGG,AGAGC,AGACA,AGACT,AGACG,AGACC,AGTAA,A  
GTAT,AGTAG,AGTAC,AGTTA,AGTTT,AGTTG,AGTTC,AGTGA,AGTGT,AGTGG,AGTGC,  
AGTCA,AGTCT,AGTCG,AGTCC,AGGAA,AGGAT,AGGAG,AGGAC,AGGTA,AGGTT,AGGT  
G,AGGTC,AGGGA,AGGGT,AGGGG,AGGGC,AGGCA,AGGCT,AGGCG,AGGCC,AGCAA,A  
GCAT,AGCAG,AGCAC,AGCTA,AGCTT,AGCTG,AGCTC,AGCGA,AGCGT,AGCGG,AGCGC  
,AGCCA,AGCCT,AGCCG,AGCCC,ACAAA,ACAAT,ACAAG,ACAAC,ACATA,ACATT,ACAT  
G,ACATC,ACAGA,ACAGT,ACAGG,ACAGC,ACACA,CACT,ACACG,ACACC,ACTAA,AC  
TAT,ACTAG,ACTAC,ACTTA,ACTTT,ACTTG,ACTTC,ACTGA,ACTGT,ACTGG,ACTGC,AC  
TCA,ACTCT,ACTCG,ACTCC,ACGAA,ACGAT,ACGAG,ACGAC,ACGTA,ACGTT,ACGTG,A  
CGTC,ACGGA,ACGGT,ACGGG,ACGGC,ACGCA,ACGCT,ACGCG,ACGCC,ACCAA,ACCAT

,ACCAG,ACCAC,ACCTA,ACCTT,ACCTG,ACCTC,ACCGA,ACCGT,ACCGG,ACCGC,ACCC  
A,ACCCT,ACCCG,ACCCC,TAAAA,TAAAT,TAAAG,TAAAC,TAATA,TAATT,TAATG,TAA  
TC,TAAGA,TAAGT,TAAGG,TAAGC,TAACA,TAACT,TAACG,TAACC,TATAA,TATAT,TAT  
AG,TATAC,TATTA,TATTT,TATTG,TATTC,TATGA,TATGT,TATGG,TATGC,TATCA,TATC  
T,TATCG,TATCC,TAGAA,TAGAT,TAGAG,TAGAC,TAGTA,TAGTT,TAGTG,TAGTC,TAGG  
A,TAGGT,TAGGG,TAGGC,TAGCA,TAGCT,TAGCG,TAGCC,TACAA,TACAT,TACAG,TAC  
AC,TACTA,TACTT,TACTG,TACTC,TACGA,TACGT,TACGG,TACGC,TACCA,TACCT,TAC  
CG,TACCC,TTAAA,TTAAT,TTAAG,TTAAC,TTATA,TTATT,TTATG,TTATC,TTAGA,TTAG  
T,TTAGG,TTAGC,TTACA,TTACT,TTACG,TTACC,TTTAA,TTTAT,TTTAG,TTTAC,TTTTA,  
TTTTT,TTTTG,TTTTC,TTTGA,TTTGT,TTTGG,TTTGC,TTTCA,TTTCT,TTTCG,TTTCC,TTG  
AA,TTGAT,TTGAG,TTGAC,TTGTA,TTGTT,TTGTG,TTGTC,TTGGA,TTGGT,TTGGG,TTGG  
C,TTGCA,TTGCT,TTGCG,TTGCC,TTCAA,TTCAT,TTCAG,TTCAC,TTCTA,TTCTT,TTCTG,  
TTCTC,TTCGA,TTCGT,TTCGG,TTCGC,TTCCA,TTCCT,TTCCG,TTCCC,TGAAA,TGAAT,T  
GAAG,TGAAC,TGATA,TGATT,TGATG,TGATC,TGAGA,TGAGT,TGAGG,TGAGC,TGACA,  
TGACT,TGACG,TGACC,TGTAA,TGTAT,TGTAG,TGTAC,TGTTA,TGTTT,TGTTG,TGTTT,T  
GTGA,TGTGT,TGTGG,TGTGC,TGTCA,TGTCT,TGTGC,TGTCC,TGGAA,TGGAT,TGGAG,T  
GGAC,TGGTA,TGGT,TGGTG,TGGTC,TGGGA,TGGGT,TGGGG,TGGGC,TGGCA,TGGCT,  
TGGCG,TGGCC,TGCAA,TGCAT,TGCAG,TGCAC,TGCTA,TGCTT,TGCTG,TGCTC,TGCGA,  
TGCGT,TGCGG,TGCGC,TGCCA,TGCCT,TGCCG,TGCCC,TCAAA,TCAAT,TCAAG,TCAAC,  
TCATA,TCATT,TCATG,TCATC,TCAGA,TCAGT,TCAGG,TCAGC,TCACA,TCACT,TCACG,  
TCACC,TCTAA,TCTAT,TCTAG,TCTAC,TCTTA,TCTTT,TCTTG,TCTTC,TCTGA,TCTGT,TC  
TGG,TCTGC,TCTCA,TCTCT,TCTCG,TCTCC,TCGAA,TCGAT,TCGAG,TCGAC,TCGTA,TCG  
TT,TCGTG,TCGTC,TCGGA,TCGGT,TCGGG,TCGGC,TCGCA,TCGCT,TCGCG,TCGCC,TCC  
AA,TCCAT,TCCAG,TCCAC,TCCTA,TCCTT,TCCTG,TCCTC,TCCGA,TCCGT,TCCGG,TCCG  
C,TCCCA,TCCCT,TCCCG,TCCCC,GAAAA,GAAAT,GAAAG,GAAAC,GAATA,GAATT,GAA  
TG,GAATC,GAAGA,GAAGT,GAAGG,GAAGC,GAACA,GAACG,GAACC,GATAA,G  
ATAT,GATAG,GATAC,GATTA,GATTT,GATTG,GATTC,GATGA,GATGT,GATGG,GATGC,  
GATCA,GATCT,GATCG,GATCC,GAGAA,GAGAT,GAGAG,GAGAC,GAGTA,GAGTT,GAGT  
G,GAGTC,GAGGA,GAGGT,GAGGG,GAGGC,GAGCA,GAGCT,GAGCG,GAGCC,GACAA,G  
ACAT,GACAG,GACAC,GACTA,GACTT,GACTG,GACTC,GACGA,GACGT,GACGG,GACGC  
,GACCA,GACCT,GACCG,GACCC,GTAAA,GTAAAT,GTAAAG,GTAAAC,GTATA,GTATT,GTAT  
G,GTATC,GTAGA,GTAGT,GTAGG,GTAGC,GTACA,GTACT,GTACG,GTACC,GTAA,GT  
AT,GTTAG,GTAC,GTTTA,GTTTT,GTTTG,GTTTT,GTTTG,GTTTT,GTTTG,GTTTT,  
A,GTTCT,GTTCG,GTTCG,GTGAA,GTGAT,GTGAG,GTGAC,GTGTA,GTGTT,GTGTG,GTGT  
C,GTGGA,GTGGT,GTGGG,GTGGC,GTGCA,GTGCT,GTGCG,GTGCC,GTCAA,GTCAT,GTC  
AG,GTCAC,GTCTA,GTCTT,GTCTG,GTCTC,GTCGA,GTCGT,GTCGG,GTCGC,GTCCA,GTC  
CT,GTCGG,GTCCC,GGAAA,GGAAT,GGAAG,GGAAC,GGATA,GGATT,GGATG,GGATC,G  
GAGA,GGAGT,GGAGG,GGAGC,GGACA,GGACT,GGACG,GGACC,GGTAA,GGTAT,GGTA  
G,GGTAC,GGTTA,GGTTT,GGTTG,GGTTC,GGTGA,GGTGT,GGTGG,GGTGC,GGTCA,GGT  
CT,GGTCG,GGTCC,GGGAA,GGGAT,GGGAG,GGGAC,GGGTA,GGGTT,GGGTG,GGGTC,G  
GGGA,GGGGT,GGGGG,GGGGC,GGGCA,GGGCT,GGGCG,GGGCC,GGCAA,GGCAT,GGCA  
G,GGCAC,GGCTA,GGCTT,GGCTG,GGCTC,GGCGA,GGCGT,GGCGG,GGCGC,GGCCA,GG  
CCT,GGCCG,GGCCC,GCAAA,GCAAT,GCAAG,GCAAC,GCATA,GCATT,GCATG,GCATC,G  
CAGA,GCAGT,GCAGG,GCAGC,GCACA,GCACT,GCACG,GCACC,GCTAA,GCTAT,GCTAG,  
GCTAC,GCTTA,GCTTT,GCTTG,GCTTC,GCTGA,GCTGT,GCTGG,GCTGC,GCTCA,GCTCT,  
GCTCG,GCTCC,GCGAA,GCGAT,GCGAG,GCGAC,GCGTA,GCGTT,GCGTG,GCGTC,GCGG  
A,GCGGT,GCGGG,GCGGC,GCGCA,GCGCT,GCGCG,GCGCC,GCCAA,GCCAT,GCCAG,GC  
CAC,GCCTA,GCCTT,GCCTG,GCCTC,GCCGA,GCCGT,GCCGG,GCCGC,GCCCA,GCCCT,G  
CCCG,GCCCC,CAAAA,CAAAT,CAAAG,CAAAC,CAATA,CAATT,CAATG,CAATC,CAAGA,  
CAAGT,CAAGG,CAAGC,CAACA,CAACT,CAACG,CAACC,CATAA,CATAT,CATAG,CATA  
C,CATTA,CATTT,CATTG,CATTC,CATGA,CATGT,CATGG,CATGC,CATCA,CATCT,CATC  
G,CATCC,CAGAA,CAGAT,CAGAG,CAGAC,CAGTA,CAGTT,CAGTG,CAGTC,CAGGA,CAG

GT,CAGGG,CAGGC,CAGCA,CAGCT,CAGCG,CAGCC,CACAA,CACAT,CACAG,CACAC,C  
ACTA,CACTT,CACTG,CACTC,CACGA,CACGT,CACGG,CACGC,CACCA,CACCT,CACCG,  
CACCC,CTAAA,CTAAT,CTAAG,CTAAC,CTATA,CTATT,CTATG,CTATC,CTAGA,CTAGT,  
CTAGG,CTAGC,CTACA,CTACT,CTACG,CTACC,CTTAA,CTTAT,CTTAG,CTTAC,CTTTA,C  
TTTT,CTTTG,CTTTC,CTTGA,CTTGT,CTTGG,CTTGC,CTTCA,CTTCT,CTTCG,CTTCC,CTG  
AA,CTGAT,CTGAG,CTGAC,CTGTA,CTGTT,CTGTG,CTGTC,CTGGA,CTGGT,CTGGG,CTG  
GC,CTGCA,CTGCT,CTGCG,CTGCC,CTCAA,CTCAT,CTCAG,CTCAC,CTCTA,CTCTT,CTCT  
G,CTCTC,CTCGA,CTCGT,CTCGG,CTCGC,CTCCA,CTCCT,CTCCG,CTCCC,CGAAA,CGAA  
T,CGAAG,CGAAC,CGATA,CGATT,CGATG,CGATC,CGAGA,CGAGT,CGAGG,CGAGC,CG  
ACA,CGACT,CGACG,CGACC,CGTAA,CGTAT,CGTAG,CGTAC,CGTTA,CGTTT,CGTTG,CG  
TTC,CGTGA,CGTGT,CGTGG,CGTGC,CGTCA,CGTCT,CGTCG,CGTCC,CGGAA,CGGAT,CG  
GAG,CGGAC,CGGTA,CGGTT,CGGTG,CGGTC,CGGGA,CGGGT,CGGGG,CGGGC,CGGCA,  
CGGCT,CGGCG,CGGCC,CGCAA,CGCAT,CGCAG,CGCAC,CGCTA,CGCTT,CGCTG,CGCTC  
,CGCGA,CGCGT,CGCGG,CGCGC,CGCCA,CGCCT,CGCCG,CGCCC,CCAAA,CCAAT,CCAA  
G,CCAAC,CCATA,CCATT,CCATG,CCATC,CCAGA,CCAGT,CCAGG,CCAGC,CCACA,CCA  
CT,CCACG,CCACC,CCTAA,CCTAT,CCTAG,CCTAC,CCTTA,CCTTT,CCTTG,CCTTC,CCTG  
A,CCTGT,CCTGG,CCTGC,CCTCA,CCTCT,CCTCG,CCTCC,CCGAA,CCGAT,CCGAG,CCGA  
C,CCGTA,CCGTT,CCGTG,CCGTC,CCGGA,CCGGT,CCGGG,CCGGC,CCGCA,CCGCT,CCGC  
G,CCGCC,CCCAA,CCCAT,CCCAG,CCCAC,CCCTA,CCCTT,CCCTG,CCCTC,CCCGA,CCCG  
T,CCCGG,CCCGC,CCCCA,CCCCT,CCCCG,CCCCC,AAAAAA,AAAAAT,AAAAAG,AAAA  
C,AAAATA,AAAATT,AAAATG,AAAATC,AAAAGA,AAAAGT,AAAAGG,AAAAGC,AAAA  
CA,AAAAC,AAAACG,AAAACC,AAATAA,AAATAT,AAATAG,AAATAC,AAATTA,AAAT  
TT,AAATTG,AAATTC,AAATGA,AAATGT,AAATGG,AAATGC,AAATCA,AAATCT,AAATC  
G,AAATCC,AAAGAA,AAAGAT,AAAGAG,AAAGAC,AAAGTA,AAAGTT,AAAGTG,AAAG  
TC,AAAGGA,AAAGGT,AAAGGG,AAAGGC,AAAGCA,AAAGCT,AAAGCG,AAAGCC,AAA  
CAA,AAACAT,AAACAG,AAACAC,AAACTA,AAACTT,AAACTG,AAACTC,AAACGA,AAA  
CGT,AAACGG,AAACGC,AAACCA,AAACCT,AAACCG,AAACCC,AATAAA,AATAAT,AAT  
AAG,AATAAC,AATATA,AATATT,AATATG,AATATC,AATAGA,AATAGT,AATAGG,AAT  
AGC,AATACA,AATACT,AATACG,AATACC,AATTA,AATTAT,AATTAG,AATTAC,AATT  
TA,AATTTT,AATTTG,AATTTT,AATTGA,AATTGT,AATTGG,AATTGC,AATTCA,AATTCT,  
AATTCG,AATTCC,AATGAA,AATGAT,AATGAG,AATGAC,AATGTA,AATGTT,AATGTG,A  
ATGTC,AATGGA,AATGGT,AATGGG,AATGGC,AATGCA,AATGCT,AATGCG,AATGCC,A  
ATCAA,AATCAT,AATCAG,AATCAC,AATCTA,AATCTT,AATCTG,AATCTC,AATCGA,AA  
TCGT,AATCGG,AATCGC,AATCCA,AATCCT,AATCCG,AATCCC,AAGAAA,AAGAAT,AAG  
AAG,AAGAAC,AAGATA,AAGATT,AAGATG,AAGATC,AAGAGA,AAGAGT,AAGAGG,AA  
GAGC,AAGACA,AAGACT,AAGACG,AAGACC,AAGTAA,AAGTAT,AAGTAG,AAGTAC,A  
AGTTA,AAGTTT,AAGTTG,AAGTTC,AAGTGA,AAGTGT,AAGTGG,AAGTGC,AAGTCA,AA  
GTCT,AAGTCG,AAGTCC,AAGGAA,AAGGAT,AAGGAG,AAGGAC,AAGGTA,AAGGTT,AA  
GGTG,AAGGTC,AAGGGA,AAGGGT,AAGGGG,AAGGGC,AAGGCA,AAGGCT,AAGGCG,A  
AGGCC,AAGCAA,AAGCAT,AAGCAG,AAGCAC,AAGCTA,AAGCTT,AAGCTG,AAGCTC,A  
AGCGA,AAGCGT,AAGCGG,AAGCGC,AAGCCA,AAGCCT,AAGCCG,AAGCCC,AACAAA,  
ACAAT,ACAAG,ACAAC,AACATA,AACATT,AACATG,AACATC,AACAGA,AACAGT,  
AACAGG,AACAGC,AACACA,AACACT,AACACG,AACACC,AACTAA,AACTAT,AACTAG,  
AACTAC,AACTTA,AACTTT,AACTTG,AACTTC,AACTGA,AACTGT,AACTGG,AACTGC,A  
ACTCA,AACTCT,AACTCG,AACTCC,AACGAA,AACGAT,AACGAG,AACGAC,AACGTA,A  
ACGTT,AACGTG,AACGTC,AACGGA,AACGGT,AACGGG,AACGGC,AACGCA,AACGCT,A  
ACGCG,AACGCC,AACCAA,AACCAT,AACCAG,AACCAC,AACCTA,AACCTT,AACCTG,A  
ACCTC,AACCGA,AACCGT,AACCGG,AACCGC,AACCCA,AACCCT,AACCCG,AACCCC,AT  
AAAA,ATAAAT,ATAAAG,ATAAAC,ATAATA,ATAATT,ATAATG,ATAATC,ATAAGA,AT  
AAGT,ATAAGG,ATAAGC,ATAACA,ATAACT,ATAACG,ATAACC,ATATAA,ATATAT,ATA  
TAG,ATATAC,ATATTA,ATATTT,ATATTG,ATATTC,ATATGA,ATATGT,ATATGG,ATATG  
C,ATATCA,ATATCT,ATATCG,ATATCC,ATAGAA,ATAGAT,ATAGAG,ATAGAC,ATAGTA,

ATAGTT,ATAGTG,ATAGTC,ATAGGA,ATAGGT,ATAGGG,ATAGGC,ATAGCA,ATAGCT,A  
TAGCG,ATAGCC,ATACAA,ATACAT,ATACAG,ATACAC,ATACTA,ATACTT,ATACTG,AT  
ACTC,ATACGA,ATACGT,ATACGG,ATACGC,ATACCA,ATACCT,ATACCG,ATACCC,ATT  
AAA,ATTAAT,ATTAAG,ATTAAC,ATTATA,ATTATT,ATTATG,ATTATC,ATTAGA,ATTAG  
T,ATTAGG,ATTAGC,ATTACA,ATTACT,ATTACG,ATTACC,ATTTAA,ATTTAT,ATTTAG,A  
TTTAC,ATTTTA,ATTTTT,ATTTTG,ATTTTC,ATTTGA,ATTTGT,ATTTGG,ATTTGC,ATTT  
A,ATTTCT,ATTTTC,ATTTCC,ATTGAA,ATTGAT,ATTGAG,ATTGAC,ATTGTA,ATTGTT,A  
TTGTG,ATTGTC,ATTGGA,ATTGGT,ATTGGG,ATTGGC,ATTGCA,ATTGCT,ATTGCG,ATT  
GCC,ATTCAA,ATTCAT,ATTCAG,ATTCAC,ATTCTA,ATTCTT,ATTCTG,ATTCTC,ATTCGA  
,ATTCGT,ATTCGG,ATTCGC,ATTCOA,ATTCCT,ATTCOG,ATTCOC,ATGAAA,ATGAAT,AT  
GAAG,ATGAAC,ATGATA,ATGATT,ATGATG,ATGATC,ATGAGA,ATGAGT,ATGAGG,AT  
GAGC,ATGACA,ATGACT,ATGACG,ATGACC,ATGTAA,ATGTAT,ATGTAG,ATGTAC,ATG  
TTA,ATGTTT,ATGTTG,ATGTTT,ATGTGA,ATGTGT,ATGTGG,ATGTGC,ATGTCA,ATGTC  
T,ATGTTC,ATGTCC,ATGGAA,ATGGAT,ATGGAG,ATGGAC,ATGGTA,ATGGTT,ATGGTG,  
ATGGTC,ATGGGA,ATGGGT,ATGGGG,ATGGGC,ATGGCA,ATGGCT,ATGGCG,ATGGCC,  
ATGCAA,ATGCAT,ATGCAG,ATGCAC,ATGCTA,ATGCTT,ATGCTG,ATGCTC,ATGCGA,A  
TGCGT,ATGCGG,ATGCGC,ATGCCA,ATGCCT,ATGCCG,ATGCCC,ATCAAA,ATCAAT,AT  
CAAG,ATCAAC,ATCATA,ATCATT,ATCATG,ATCATC,ATCAGA,ATCAGT,ATCAGG,ATC  
AGC,ATCACA,ATCACT,ATCACG,ATCACC,ATCTAA,ATCTAT,ATCTAG,ATCTAC,ATCTT  
A,ATCTTT,ATCTTG,ATCTTC,ATCTGA,ATCTGT,ATCTGG,ATCTGC,ATCTCA,ATCTCT,A  
TCTCG,ATCTCC,ATCGAA,ATCGAT,ATCGAG,ATCGAC,ATCGTA,ATCGTT,ATCGTG,ATC  
GTC,ATCGGA,ATCGGT,ATCGGG,ATCGGC,ATCGCA,ATCGCT,ATCGCG,ATCGCC,ATCC  
AA,ATCCAT,ATCCAG,ATCCAC,ATCCTA,ATCCTT,ATCCTG,ATCCTC,ATCCGA,ATCCGT,  
ATCCGG,ATCCGC,ATCCCA,ATCCCT,ATCCCG,ATCCCC,AGAAAA,AGAAAT,AGAAAG,A  
GAAAC,AGAATA,AGAATT,AGAATG,AGAATC,AGAAGA,AGAAGT,AGAAGG,AGAAGC,  
AGAACA,AGAACT,AGAACG,AGAACC,AGATAA,AGATAT,AGATAG,AGATAC,AGATTA,  
AGATTT,AGATTG,AGATTC,AGATGA,AGATGT,AGATGG,AGATGC,AGATCA,AGATCT,A  
GATCG,AGATCC,AGAGAA,AGAGAT,AGAGAG,AGAGAC,AGAGTA,AGAGTT,AGAGTG,  
AGAGTC,AGAGGA,AGAGGT,AGAGGG,AGAGGC,AGAGCA,AGAGCT,AGAGCG,AGAGC  
C,AGACAA,AGACAT,AGACAG,AGACAC,AGACTA,AGACTT,AGACTG,AGACTC,AGACG  
A,AGACGT,AGACGG,AGACGC,AGACCA,AGACCT,AGACCG,AGACCC,AGTAAA,AGTAA  
T,AGTAAG,AGTAAC,AGTATA,AGTATT,AGTATG,AGTATC,AGTAGA,AGTAGT,AGTAGG  
,AGTAGC,AGTACA,AGTACT,AGTACG,AGTACC,AGTTAA,AGTTAT,AGTTAG,AGTTAC,  
AGTTTA,AGTTTT,AGTTTG,AGTTTC,AGTTGA,AGTTGT,AGTTGG,AGTTGC,AGTTCA,AG  
TTCT,AGTTTC,AGTTCC,AGTGAA,AGTGAT,AGTGAG,AGTGAC,AGTGTA,AGTGTT,AGT  
GTG,AGTGTG,AGTGGA,AGTGGT,AGTGGG,AGTGGC,AGTGCA,AGTGCT,AGTGCG,AGT  
GCC,AGTCAA,AGTCAT,AGTCAG,AGTCAC,AGTCTA,AGTCTT,AGTCTG,AGTCTC,AGTC  
GA,AGTCGT,AGTCGG,AGTCGC,AGTCCA,AGTCCT,AGTCCG,AGTCCC,AGGAAA,AGGA  
AT,AGGAAG,AGGAAC,AGGATA,AGGATT,AGGATG,AGGATC,AGGAGA,AGGAGT,AGG  
AGG,AGGAGC,AGGACA,AGGACT,AGGACG,AGGACC,AGGTAA,AGGTAT,AGGTAG,AG  
GTAC,AGGTTA,AGGTTT,AGGTTG,AGGTTT,AGGTTG,AGGTTT,AGGTTG,AGGTTT,AG  
TCA,AGGTCT,AGGTTC,AGGTCC,AGGGAA,AGGGAT,AGGGAG,AGGGAC,AGGGTA,AGG  
GTT,AGGGTG,AGGGTC,AGGGGA,AGGGGT,AGGGGG,AGGGGC,AGGGCA,AGGGCT,AG  
GGCG,AGGGCC,AGGCAA,AGGCAT,AGGCAG,AGGCAC,AGGCTA,AGGCTT,AGGCTG,AG  
GCTC,AGGCGA,AGGCGT,AGGCGG,AGGCGC,AGGCCA,AGGCCT,AGGCCG,AGGCCC,AG  
CAAA,AGCAAT,AGCAAG,AGCAAC,AGCATA,AGCATT,AGCATG,AGCATC,AGCAGA,AG  
CAGT,AGCAGG,AGCAGC,AGCACA,AGCACT,AGCACG,AGCAC,AGCTAA,AGCTAT,AG  
CTAG,AGCTAC,AGCTTA,AGCTTT,AGCTTG,AGCTTC,AGCTGA,AGCTGT,AGCTGG,AGC  
TGC,AGCTCA,AGCTCT,AGCTCG,AGCTCC,AGCGAA,AGCGAT,AGCGAG,AGCGAC,AGC  
GTA,AGCGTT,AGCGTG,AGCGTC,AGCGGA,AGCGGT,AGCGGG,AGCGGC,AGCGCA,AGC  
GCT,AGCGCG,AGCGCC,AGCCAA,AGCCAT,AGCCAG,AGCCAC,AGCCTA,AGCCTT,AGC  
CTG,AGCCTC,AGCCGA,AGCCGT,AGCCGG,AGCCGC,AGCCCA,AGCCCT,AGCCCG,AGC



CCC,ACAAAA,ACAAAT,ACAAAG,ACAAAC,ACAATA,ACAATT,ACAATG,ACAATC,ACA  
AGA,ACAAGT,ACAAGG,ACAAGC,ACAACA,ACAAC T,ACAACG,ACAACC,ACATAA,ACA  
TAT,ACATAG,ACATAC,ACATTA,ACATTT,ACATTG,ACATTC,ACATGA,ACATGT,ACAT  
GG,ACATGC,ACATCA,ACATCT,ACATCG,ACATCC,ACAGAA,ACAGAT,ACAGAG,ACAG  
AC,ACAGTA,ACAGTT,ACAGTG,ACAGTC,ACAGGA,ACAGGT,ACAGGG,ACAGGC,ACAG  
CA,ACAGCT,ACAGCG,ACAGCC,ACACAA,ACACAT,ACACAG,ACACAC,ACACTA,ACAC  
TT,ACACTG,ACACTC,ACACGA,ACACGT,ACACGG,ACACGC,ACACCA,ACACCT,ACACC  
G,ACACCC,ACTAAA,ACTAAT,ACTAAG,ACTAAC,ACTATA,ACTATT,ACTATG,ACTATC,  
ACTAGA,ACTAGT,ACTAGG,ACTAGC,ACTACA,ACTACT,ACTACG,ACTACC,ACTTAA,A  
CTTAT,ACTTAG,ACTTAC,ACTTTA,ACTTTT,ACTTTG,ACTTTC,ACTTGA,ACTTGT,ACTT  
GG,ACTTGC,ACTTCA,ACTTCT,ACTTCG,ACTTCC,ACTGAA,ACTGAT,ACTGAG,ACTGAC  
,ACTGTA,ACTGTT,ACTGTG,ACTGTC,ACTGGA,ACTGGT,ACTGGG,ACTGGC,ACTGCA,A  
CTGCT,ACTGCG,ACTGCC,ACTCAA,ACTCAT,ACTCAG,ACTCAC,ACTCTA,ACTCTT,ACT  
CTG,ACTCTC,ACTCGA,ACTCGT,ACTCGG,ACTCGC,ACTCCA,ACTCCT,ACTCCG,ACTCC  
C,ACGAAA,ACGAAT,ACGAAG,ACGAAC,ACGATA,ACGATT,ACGATG,ACGATC,ACGAG  
A,ACGAGT,ACGAGG,ACGAGC,ACGACA,ACGACT,ACGACG,ACGACC,ACGTAA,ACGTA  
T,ACGTAG,ACGTAC,ACGTTA,ACGTTT,ACGTTG,ACGTTC,ACGTGA,ACGTGT,ACGTGG,  
ACGTGC,ACGTCA,ACGTCT,ACGTTCG,ACGTCC,ACGGAA,ACGGAT,ACGGAG,ACGGAC,  
ACGGTA,ACGGTT,ACGGTG,ACGGTC,ACGGGA,ACGGGT,ACGGGG,ACGGGC,ACGGCA,  
ACGGCT,ACGGCG,ACGGCC,ACGCAA,ACGCAT,ACGCAG,ACGCAC,ACGCTA,ACGCTT,  
ACGCTG,ACGCTC,ACGCGA,ACGCGT,ACGCGG,ACGCGC,ACGCCA,ACGCCT,ACGCCG,  
ACGCCC,ACCAAA,ACCAAT,ACCAAG,ACCAAC,ACCATA,ACCATT,ACCATG,ACCATC,A  
CCAGA,ACCAGT,ACCAGG,ACCAGC,ACCACA,ACCACT,ACCACG,ACCACC,ACCTAA,A  
CCTAT,ACCTAG,ACCTAC,ACCTTA,ACCTTT,ACCTTG,ACCTTC,ACCTGA,ACCTGT,ACC  
TGG,ACCTGC,ACCTCA,ACCTCT,ACCTCG,ACCTCC,ACCGAA,ACCGAT,ACCGAG,ACCG  
AC,ACCGTA,ACCGTT,ACCGTG,ACCGTC,ACCGGA,ACCGGT,ACCGGG,ACCGGC,ACCGC  
A,ACCGCT,ACCGCG,ACCGCC,ACCCAA,ACCCAT,ACCCAG,ACCCAC,ACCCTA,ACCCTT,  
ACCCTG,ACCCTC,ACCCGA,ACCCGT,ACCCGG,ACCCGC,ACCCCA,ACCCCT,ACCCCG,A  
CCCCC,TAAAAA,TAAAAT,TAAAAG,TAAAAC,TAAATA,TAAATT,TAAATG,TAAATC,TA  
AAGA,TAAAGT,TAAAGG,TAAAGC,TAAACA,TAAACT,TAAACG,TAAACC,TAATAA,TA  
ATAT,TAATAG,TAATAC,TAATTA,TAATTT,TAATTG,TAATTC,TAATGA,TAATGT,TAAT  
GG,TAATGC,TAATCA,TAATCT,TAATCG,TAATCC,TAAGAA,TAAGAT,TAAGAG,TAAGA  
C,TAAGTA,TAAGTT,TAAGTG,TAAGTC,TAAGGA,TAAGGT,TAAGGG,TAAGGC,TAAGCA  
,TAAGCT,TAAGCG,TAAGCC,TAACAA,TAACAT,TAACAG,TAACAC,TAACTA,TAACTT,T  
AACTG,TAACTC,TAACGA,TAACGT,TAACGG,TAACGC,TAACCA,TAACCT,TAACCG,TA  
ACCC,TATAAA,TATAAT,TATAAG,TATAAC,TATATA,TATATT,TATATG,TATATC,TATA  
GA,TATAGT,TATAGG,TATAGC,TATACA,TATACT,TATACG,TATACC,TATTAA,TATTAT,  
TATTAG,TATTAC,TATTTA,TATTTT,TATTTG,TATTTTC,TATTGA,TATTGT,TATTGG,TATT  
GC,TATTCA,TATTCT,TATTCG,TATTCC,TATGAA,TATGAT,TATGAG,TATGAC,TATGTA,  
TATGTT,TATGTG,TATGTC,TATGGA,TATGGT,TATGGG,TATGGC,TATGCA,TATGCT,TA  
TGCG,TATGCC,TATCAA,TATCAT,TATCAG,TATCAC,TATCTA,TATCTT,TATCTG,TATCT  
C,TATCGA,TATCGT,TATCGG,TATCGC,TATCCA,TATCCT,TATCCG,TATCCC,TAGAAA,T  
AGAAT,TAGAAG,TAGAAC,TAGATA,TAGATT,TAGATG,TAGATC,TAGAGA,TAGAGT,TA  
GAGG,TAGAGC,TAGACA,TAGACT,TAGACG,TAGACC,TAGTAA,TAGTAT,TAGTAG,TAG  
TAC,TAGTTA,TAGTTT,TAGTTG,TAGTTC,TAGTGA,TAGTGT,TAGTGG,TAGTGC,TAGTC  
A,TAGTCT,TAGTCG,TAGTCC,TAGGAA,TAGGAT,TAGGAG,TAGGAC,TAGGTA,TAGGTT,  
TAGGTG,TAGGTC,TAGGGA,TAGGGT,TAGGGG,TAGGGC,TAGGCA,TAGGCT,TAGGCG,T  
AGGCC,TAGCAA,TAGCAT,TAGCAG,TAGCAC,TAGCTA,TAGCTT,TAGCTG,TAGCTC,TA  
GCCA,TAGCGT,TAGCGG,TAGCGC,TAGCCA,TAGCCT,TAGCCG,TAGCCC,TACAAA,TAC  
AAT,TACAAG,TACAAC,TACATA,TACATT,TACATG,TACATC,TACAGA,TACAGT,TACA  
GG,TACAGC,TACACA,TACACT,TACACG,TACACC,TACTAA,TACTAT,TACTAG,TACTAC  
,TACTTA,TACTTT,TACTTG,TACTTC,TACTGA,TACTGT,TACTGG,TACTGC,TACTCA,TA

CTCT, TACTCG, TACTCC, TACGAA, TACGAT, TACGAG, TACGAC, TACGTA, TACGTT, TACG  
TG, TACGTC, TACGGA, TACGGT, TACGGG, TACGGC, TACGCA, TACGCT, TACGCG, TACGC  
C, TACCAA, TACCAT, TACCAG, TACCAC, TACCTA, TACCTT, TACCTG, TACCTC, TACCGA, T  
ACCGT, TACCGG, TACCGC, TACCCA, TACCCT, TACCCG, TACCCC, TAAAA, TAAAT, TTA  
AAG, TAAAC, TAAATA, TAAATT, TAAATG, TAAATC, TAAAGA, TAAAGT, TAAAGG, TAAAG  
C, TAAACA, TAAACT, TAAACG, TAAACC, TTATAA, TTATAT, TTATAG, TTATAC, TTATTA, T  
TATTT, TTATTG, TTATTC, TTATGA, TTATGT, TTATGG, TTATGC, TTATCA, TTATCT, TTATC  
G, TTATCC, TTAGAA, TTAGAT, TTAGAG, TTAGAC, TTAGTA, TTAGTT, TTAGTG, TTAGTC, T  
TAGGA, TTAGGT, TTAGGG, TTAGGC, TTAGCA, TTAGCT, TTAGCG, TTAGCC, TTACAA, TTA  
CAT, TTACAG, TTACAC, TACTA, TACTT, TACTG, TACTC, TTACGA, TTACGT, TTACGG  
, TTACGC, TTACCA, TTACCT, TTACCG, TTACCC, TTAAA, TTAAAT, TTAAAG, TTAAAC, TTT  
ATA, TTTATT, TTTATG, TTTATC, TTTAGA, TTTAGT, TTTAGG, TTTAGC, TTTACA, TTTACT,  
TTTACG, TTTACC, TTTTAA, TTTTAT, TTTTAG, TTTTAC, TTTTAA, TTTTTC, TTTTGG, TTTT  
C, TTTTGA, TTTTGT, TTTTGG, TTTTGC, TTTTCA, TTTTCT, TTTTCG, TTTTCC, TTTGAA, TTT  
GAT, TTTGAG, TTTGAC, TTTGTA, TTTGTT, TTTGTG, TTTGTC, TTTGGA, TTTGGT, TTTGGG,  
TTTGGC, TTTGCA, TTTGCT, TTTGCG, TTTGCC, TTTCAA, TTTCAT, TTTCAG, TTTCAC, TTTC  
TA, TTTCCT, TTTCCTG, TTTCCTC, TTTCGA, TTTCGT, TTTCGG, TTTCGC, TTTCCTA, TTTCCTT, TT  
TCCG, TTTCCC, TTGAAA, TTGAAT, TTGAAG, TTGAAC, TTGATA, TTGATT, TTGATG, TTGA  
TC, TTGAGA, TTGAGT, TTGAGG, TTGAGC, TTGACA, TTGACT, TTGACG, TTGACC, TTGTAA,  
TTGTAT, TTGTAG, TTGTAC, TTGTAA, TTGTTT, TTGTTG, TTGTTT, TTGTGA, TTGTGT, TTGT  
GG, TTGTGC, TTGTCA, TTGTCT, TTGTTC, TTGTCC, TTGGAA, TTGGAT, TTGGAG, TTGGAC,  
TTGGTA, TTGGTT, TTGGTG, TTGGTC, TTGGGA, TTGGGT, TTGGGG, TTGGGC, TTGGCA, TT  
GGCT, TTGGCG, TTGGCC, TTGCAA, TTGCAT, TTGCAG, TTGCAC, TTGCTA, TTGCTT, TTGCT  
G, TTGCTC, TTGCGA, TTGCGT, TTGCGG, TTGCGC, TTGCCA, TTGCCT, TTGCCG, TTGCCC, T  
TCAAA, TTCAAT, TTCAAG, TTCAAC, TTCATA, TTCATT, TTCATG, TTCATC, TTCAGA, TTCAG  
GT, TTCAGG, TTCAGC, TTCACA, TTCACT, TTCACG, TTCACC, TTCTAA, TTCTAT, TTCTAG, T  
TCTAC, TTCTTA, TTCTTT, TTCTTG, TTCTTC, TTCTGA, TTCTGT, TTCTGG, TTCTGC, TTCTC  
A, TTCTCT, TTCTCG, TTCTCC, TTCGAA, TTCGAT, TTCGAG, TTCGAC, TTCGTA, TTCGTT, TT  
CGTG, TTCGTC, TTCGGA, TTCGGT, TTCGGG, TTCGGC, TTCGCA, TTCGCT, TTCGCG, TTCGC  
C, TTCCAA, TTCCAT, TTCCAG, TTCCAC, TTCCTA, TTCCTT, TTCCTG, TTCCTC, TTCCGA, TT  
CCGT, TTCCGG, TTCCGC, TTCCA, TTCCCT, TTCCCG, TTCCCC, TGAAAA, TGA AAT, TGAA  
AG, TGA AAC, TGAATA, TGAATT, TGAATG, TGAATC, TGAAGA, TGAAGT, TGAAGG, TGA  
GC, TGAACA, TGA ACT, TGAACG, TGAACC, TGATAA, TGATAT, TGATAG, TGATAC, TGATT  
A, TGATTT, TGATTG, TGATTC, TGATGA, TGATGT, TGATGG, TGATGC, TGATCA, TGATCT, T  
GATCG, TGATCC, TGAGAA, TGAGAT, TGAGAG, TGAGAC, TGAGTA, TGAGTT, TGAGTG, TG  
AGTC, TGAGGA, TGAGGT, TGAGGG, TGAGGC, TGAGCA, TGAGCT, TGAGCG, TGAGCC, TG  
ACAA, TGACAT, TGACAG, TGACAC, TGACTA, TGACTT, TGACTG, TGACTC, TGACGA, TGA  
CGT, TGACGG, TGACGC, TGACCA, TGACCT, TGACCG, TGACCC, TGTA AA, TGTAAT, TGTA  
AG, TGTAAC, TGTATA, TGTATT, TGTATG, TGTATC, TGTAGA, TGTAGT, TGTAGG, TGTAGC,  
TGTACA, TGTACT, TGTACG, TGTACC, TGTTAA, TGTTAT, TGTTAG, TGTTAC, TGTTTA, TGT  
TTT, TGTTTG, TGTTTC, TGTTGA, TGTTGT, TGTTGG, TGTTGC, TGTTCA, TGTTCT, TGTTCCG,  
TGTTCC, TGTGAA, TGTGAT, TGTGAG, TGTGAC, TGTGTA, TGTGTT, TGTGTG, TGTGTC, TG  
TGGA, TGTGGT, TGTGGG, TGTGGC, TGTGCA, TGTGCT, TGTGCG, TGTGCC, TGTCAA, TGTC  
AT, TGTCAG, TGTCAC, TGTCTA, TGTCTT, TGTCTG, TGTCTC, TGTCGA, TGTCGT, TGTCGG,  
TGTCGC, TGTTCA, TGTCCCT, TGTCCG, TGTCCC, TGGA AA, TGA AAT, TGA AAG, TGA AAC, TG  
GATA, TGGATT, TGGATG, TGGATC, TGGAGA, TGGAGT, TGGAGG, TGGAGC, TGGACA, TGG  
ACT, TGGACG, TGGACC, TGGTAA, TGGTAT, TGGTAG, TGGTAC, TGGTTA, TGGTTT, TGGTT  
G, TGGTTC, TGGTGA, TGGTGT, TGGTGG, TGGTGC, TGGTCA, TGGTCT, TGGTCG, TGGTCC, T  
GGGAA, TGGGAT, TGGGAG, TGGGAC, TGGGTA, TGGGTT, TGGGTG, TGGGTC, TGGGGA, T  
GGGGT, TGGGGG, TGGGGC, TGGGCA, TGGGCT, TGGGCG, TGGGCC, TGGCAA, TGGCAT, T  
GGCAG, TGGCAC, TGGCTA, TGGCTT, TGGCTG, TGGCTC, TGGCGA, TGGCGT, TGGCGG, TG  
GCGC, TGGCCA, TGGCCT, TGGCCG, TGGCCC, TGCAAA, TGCAAT, TGCAAG, TGCAAC, TGC

ATA,TGCATT,TGCATG,TGCATC,TGCAGA,TGCAGT,TGCAGG,TGCAGC,TGCACA,TGCA  
CT,TGCACG,TGCACC,TGCTAA,TGCTAT,TGCTAG,TGCTAC,TGCTTA,TGCTTT,TGCTTG,  
TGCTTC,TGCTGA,TGCTGT,TGCTGG,TGCTGC,TGCTCA,TGCTCT,TGCTCG,TGCTCC,TGC  
GAA,TGCGAT,TGCGAG,TGCGAC,TGCGTA,TGCGTT,TGCGTG,TGCGTC,TGCGGA,TGCG  
GT,TGCGGG,TGCGGC,TGCGCA,TGCGCT,TGCGCG,TGCGCC,TGCCAA,TGCCAT,TGCCA  
G,TGCCAC,TGCCTA,TGCCTT,TGCCTG,TGCCTC,TGCCGA,TGCCGT,TGCCGG,TGCCGC,T  
GCCCA,TGCCCT,TGCCCG,TGCCCC,TCAAAA,TCAAAT,TCAAAG,TCAAAC,TCAATA,TC  
AATT,TCAATG,TCAATC,TCAAGA,TCAAGT,TCAAGG,TCAAGC,TCAACA,TCAACT,TCA  
ACG,TCAACC,TCATAA,TCATAT,TCATAG,TCATAC,TCATTA,TCATTT,TCATTG,TCATTC  
,TCATGA,TCATGT,TCATGG,TCATGC,TCATCA,TCATCT,TCATCG,TCATCC,TCAGAA,TC  
AGAT,TCAGAG,TCAGAC,TCAGTA,TCAGTT,TCAGTG,TCAGTC,TCAGGA,TCAGGT,TCA  
GGG,TCAGGC,TCAGCA,TCAGCT,TCAGCG,TCAGCC,TCACAA,TCACAT,TCACAG,TCAC  
AC,TCACTA,TCACTT,TCACTG,TCACTC,TCACGA,TCACGT,TCACGG,TCACGC,TCACCA,  
TCACCT,TCACCG,TCACCC,TCTAAA,TCTAAT,TCTAAG,TCTAAC,TCTATA,TCTATT,TCT  
ATG,TCTATC,TCTAGA,TCTAGT,TCTAGG,TCTAGC,TCTACA,TCTACT,TCTACG,TCTACC  
,TCTTAA,TCTTAT,TCTTAG,TCTTAC,TCTTTA,TCTTTT,TCTTTG,TCTTTC,TCTTGA,TCTT  
GT,TCTTGG,TCTTGC,TCTTCA,TCTTCT,TCTTCG,TCTTCC,TCTGAA,TCTGAT,TCTGAG,T  
CTGAC,TCTGTA,TCTGTT,TCTGTG,TCTGTC,TCTGGA,TCTGGT,TCTGGG,TCTGGC,TCTG  
CA,TCTGCT,TCTGCG,TCTGCC,TCTCAA,TCTCAT,TCTCAG,TCTCAC,TCTCTA,TCTCTT,T  
CTCTG,TCTCTC,TCTCGA,TCTCGT,TCTCGG,TCTCGC,TCTCCA,TCTCCT,TCTCCG,TCTCC  
C,TCGAAA,TCGAAT,TCGAAG,TCGAAC,TCGATA,TCGATT,TCGATG,TCGATC,TCGAGA,  
TCGAGT,TCGAGG,TCGAGC,TCGACA,TCGACT,TCGACG,TCGACC,TCGTAA,TCGTAT,TC  
GTAG,TCGTAC,TCGTTA,TCGTTT,TCGTTG,TCGTTT,TCGTGA,TCGTGT,TCGTGG,TCGTG  
C,TCGTCA,TCGTCT,TCGTCC,TCGGAA,TCGGAT,TCGGAG,TCGGAC,TCGGTA,  
TCGGTT,TCGGTG,TCGGTC,TCGGGA,TCGGGT,TCGGGG,TCGGGC,TCGGCA,TCGGCT,TC  
GGCG,TCGGCC,TCGCAA,TCGCAT,TCGCAG,TCGCAC,TCGCTA,TCGCTT,TCGCTG,TCGC  
TC,TCGCGA,TCGCGT,TCGCGG,TCGCGC,TCGCCA,TCGCCT,TCGCCG,TCGCCC,TCCAAA  
,TCCAAT,TCCAAG,TCCAAC,TCCATA,TCCATT,TCCATG,TCCATC,TCCAGA,TCCAGT,TC  
CAGG,TCCAGC,TCCACA,TCCACT,TCCACG,TCCACC,TCCTAA,TCCTAT,TCCTAG,TCCT  
AC,TCCTTA,TCCTTT,TCCTTG,TCCTTC,TCCTGA,TCCTGT,TCCTGG,TCCTGC,TCCTCA,T  
CCTCT,TCCTCG,TCCTCC,TCCGAA,TCCGAT,TCCGAG,TCCGAC,TCCGTA,TCCGTT,TCCG  
TG,TCCGTC,TCCGGA,TCCGGT,TCCGGG,TCCGGC,TCCGCA,TCCGCT,TCCGCG,TCCGCC,  
TCCCAA,TCCCAT,TCCCAG,TCCCAC,TCCCCTA,TCCCCTT,TCCCCTG,TCCCCTC,TCCCCTG,  
TCCCCTC,TCCCCTG,TCCCCTC,TCCCCTG,TCCCCTC,TCCCCTG,TCCCCTC,TCCCCTG,TCCCCTC,  
GAAAAA,GAAAAT,GAAA  
AG,GAAAAC,GAAAATA,GAAATT,GAAATG,GAAATC,GAAAGA,GAAAGT,GAAAGG,GAA  
AGC,GAAACA,GAAACT,GAAACG,GAAACC,GAATAA,GAATAT,GAATAG,GAATAC,GA  
ATTA,GAATTT,GAATTG,GAATTC,GAATGA,GAATGT,GAATGG,GAATGC,GAATCA,GAA  
TCT,GAATCG,GAATCC,GAAGAA,GAAGAT,GAAGAG,GAAGAC,GAAGTA,GAAGTT,GAA  
GTG,GAAGTC,GAAGGA,GAAGGT,GAAGGG,GAAGGC,GAAGCA,GAAGCT,GAAGCG,GA  
AGCC,GAACAA,GAACAT,GAACAG,GAACAC,GAACTA,GAACTT,GAACTG,GAACTC,GA  
ACGA,GAACGT,GAACGG,GAACGC,GAACCA,GAACCT,GAACCG,GAACCC,GATAAA,GA  
TAAT,GATAAG,GATAAC,GATATA,GATATT,GATATG,GATATC,GATAGA,GATAGT,GAT  
AGG,GATAGC,GATACA,GATACT,GATACG,GATACC,GATTAA,GATTAT,GATTAG,GATT  
AC,GATTTA,GATTTT,GATTTG,GATTTT,GATTTT,GATTGA,GATTGT,GATTGG,GATTGC,GATTCA,  
GATTCT,GATTTC,GATTCC,GATGAA,GATGAT,GATGAG,GATGAC,GATGTA,GATGTT,G  
ATGTG,GATGTC,GATGGA,GATGGT,GATGGG,GATGGC,GATGCA,GATGCT,GATGCG,G  
ATGCC,GATCAA,GATCAT,GATCAG,GATCAC,GATCTA,GATCTT,GATCTG,GATCTC,GA  
TCGA,GATCGT,GATCGG,GATCGC,GATCCA,GATCCT,GATCCG,GATCCC,GAGAAA,GAG  
AAT,GAGAAG,GAGAAC,GAGATA,GAGATT,GAGATG,GAGATC,GAGAGA,GAGAGT,GA  
GAGG,GAGAGC,GAGACA,GAGACT,GAGACG,GAGACC,GAGTAA,GAGTAT,GAGTAG,G  
AGTAC,GAGTTA,GAGTTT,GAGTTG,GAGTTC,GAGTGA,GAGTGT,GAGTGG,GAGTGC,GA  
GTCA,GAGTCT,GAGTCG,GAGTCC,GAGGAA,GAGGAT,GAGGAG,GAGGAC,GAGGTA,GA

GGTT,GAGGTG,GAGGTC,GAGGGA,GAGGGT,GAGGGG,GAGGGC,GAGGCA,GAGGCT,G  
AGGCG,GAGGCC,GAGCAA,GAGCAT,GAGCAG,GAGCAC,GAGCTA,GAGCTT,GAGCTG,G  
AGCTC,GAGCGA,GAGCGT,GAGCGG,GAGCGC,GAGCCA,GAGCCT,GAGCCG,GAGCCC,G  
ACAAA,GACAAT,GACAAG,GACAAC,GACATA,GACATT,GACATG,GACATC,GACAGA,G  
ACAGT,GACAGG,GACAGC,GACACA,GACACT,GACACG,GACACC,GACTAA,GACTAT,G  
ACTAG,GACTAC,GACTTA,GACTTT,GACTTG,GACTTC,GACTGA,GACTGT,GACTGG,GA  
CTGC,GACTCA,GACTCT,GACTCG,GACTCC,GACGAA,GACGAT,GACGAG,GACGAC,GA  
CGTA,GACGTT,GACGTG,GACGTC,GACGGA,GACGGT,GACGGG,GACGGC,GACGCA,GA  
CGCT,GACGCG,GACGCC,GACCAA,GACCAT,GACCAG,GACCAC,GACCTA,GACCTT,GA  
CCTG,GACCTC,GACCGA,GACCGT,GACCGG,GACCGC,GACCCA,GACCCT,GACCCG,GA  
CCCC,GTAAAA,GTAAAT,GTAAAG,GTAAAC,GTAAATA,GTAAAT,GTAAATG,GTAAATC,GTAA  
AGA,GTAAAGT,GTAAAGG,GTAAAGC,GTAAACA,GTAACT,GTAAACG,GTAAACC,GTATAA,GTAA  
TAT,GTATAG,GTATAC,GTATTA,GTATTT,GTATTG,GTATTC,GTATGA,GTATGT,GTATG  
G,GTATGC,GTATCA,GTATCT,GTATCG,GTATCC,GTAGAA,GTAGAT,GTAGAG,GTAGAC,  
GTAGTA,GTAGTT,GTAGTG,GTAGTC,GTAGGA,GTAGGT,GTAGGG,GTAGGC,GTAGCA,G  
TAGCT,GTAGCG,GTAGCC,GTACAA,GTACAT,GTACAG,GTACAC,GACTA,GACTT,GT  
ACTG,GTACTC,GTACGA,GTACGT,GTACGG,GTACGC,GTACCA,GTACCT,GTACCG,GTAA  
CCC,GTTAAA,GTTAAT,GTTAAG,GTTAAC,GTTATA,GTTATT,GTTATG,GTTATC,GTTAG  
A,GTTAGT,GTTAGG,GTTAGC,GTTACA,GTTACT,GTTACG,GTTACC,GTTTAA,GTTTAT,G  
TTTAG,GTTTAC,GTTTTA,GTTTTT,GTTTTG,GTTTTC,GTTTGA,GTTTGT,GTTTGG,GTTT  
C,GTTTCA,GTTTCT,GTTTCG,GTTTCC,GTTTGA,GTTTGT,GTTTGC,GTTTGA,G  
TTGTT,GTTGTG,GTTGTC,GTTGGA,GTTGGT,GTTGGG,GTTGGC,GTTGCA,GTTGCT,GTT  
GCG,GTTGCC,GTTCAA,GTTTCAT,GTTTCAG,GTTTCAC,GTTTCTA,GTTTCTT,GTTTCTG,GTTTCTC  
,GTTTCGA,GTTTCGT,GTTTCGG,GTTTCGC,GTTTCCA,GTTTCTT,GTTTCCG,GTTTCCC,GTGAAA,GT  
GAAT,GTGAAG,GTGAAC,GTGATA,GTGATT,GTGATG,GTGATC,GTGAGA,GTGAGT,GTG  
AGG,GTGAGC,GTGACA,GTGACT,GTGACG,GTGACC,GTGTAA,GTGTAT,GTGTAG,GTGT  
AC,GTGTTA,GTGTTT,GTGTTG,GTGTTC,GTGTGA,GTGTGT,GTGTGG,GTGTGC,GTGTCA,  
GTGTCT,GTGTTC,GTGTCC,GTGGAA,GTGGAT,GTGGAG,GTGGAC,GTGGTA,GTGGTT,G  
TGGTG,GTGGTC,GTGGGA,GTGGGT,GTGGGG,GTGGGC,GTGGCA,GTGGCT,GTGGCG,GT  
GGCC,GTGCAA,GTGCAT,GTGCAG,GTGCAC,GTGCTA,GTGCTT,GTGCTG,GTGCTC,GTG  
CGA,GTGCGT,GTGCGG,GTGCGC,GTGCCA,GTGCCT,GTGCCG,GTGCCC,GTCAAA,GTCA  
AT,GTCAAG,GTCAAC,GTCCATA,GTCCATT,GTCCATG,GTCCATC,GTCCAGA,GTCCAGT,GTCCAG  
G,GTCCAGC,GTCCACA,GTCCACT,GTCCACG,GTCCACC,GTCTAA,GTCTAT,GTCTAG,GTCTAC,  
GTCTTA,GTCTTT,GTCTTG,GTCTTC,GTCTGA,GTCTGT,GTCTGG,GTCTGC,GTCTCA,GTCT  
TCT,GTCTCG,GTCTCC,GTCCGAA,GTCCGAT,GTCCGAG,GTCCGAC,GTCCGTA,GTCCGTT,GTCCGT  
G,GTCCGTC,GTCCGGA,GTCCGGT,GTCCGGG,GTCCGGC,GTCCGCA,GTCCGCT,GTCCGCG,GTCCGCC,  
GTCCAA,GTCCAT,GTCCAG,GTCCAC,GTCCCTA,GTCCCTT,GTCCCTG,GTCCCTC,GTCCGA,GT  
CCGT,GTCCGG,GTCCGC,GTCCCA,GTCCCT,GTCCCG,GTCCCC,GGAAAA,GGAAAT,GGAA  
AAG,GGAAAC,GGAAATA,GGAAAT,GGAAATG,GGAAATC,GGAAAGA,GGAAAGT,GGAAAGG,GG  
AAGC,GGAAACA,GGAAACT,GGAAACG,GGAAACC,GGATAA,GGATAT,GGATAG,GGATAC,G  
GATTA,GGATTT,GGATTG,GGATTC,GGATGA,GGATGT,GGATGG,GGATGC,GGATCA,GG  
ATCT,GGATCG,GGATCC,GGAGAA,GGAGAT,GGAGAG,GGAGAC,GGAGTA,GGAGTT,GG  
AGTG,GGAGTC,GGAGGA,GGAGGT,GGAGGG,GGAGGC,GGAGCA,GGAGCT,GGAGCG,G  
GAGCC,GGACAA,GGACAT,GGACAG,GGACAC,GGACTA,GGACTT,GGACTG,GGACTC,G  
GACGA,GGACGT,GGACGG,GGACGC,GGACCA,GGACCT,GGACCG,GGACCC,GGTAAA,G  
GTAAT,GGTAAG,GGTAAC,GGTATA,GGTATT,GGTATG,GGTATC,GGTAGA,GGTAGT,GG  
TAGG,GGTAGC,GGTACA,GGTACT,GGTACG,GGTACC,GGTTAA,GGTTAT,GGTTAG,GGT  
TAC,GGTTTA,GGTTTT,GGTTTG,GGTTTC,GGTTGA,GGTTGT,GGTTGG,GGTTGC,GGTT  
A,GGTTCT,GGTTTC,GGTTCC,GGTTGA,GGTTGAT,GGTTGAG,GGTTGAC,GGTTGTA,GGTTGTT,  
GGTTGT,GGTTGC,GGTTGA,GGTTGGT,GGTTGGG,GGTTGGC,GGTTGCA,GGTTGCT,GGTTGCG,  
GGTTGCC,GGTTCAA,GGTTTCAT,GGTTTCAG,GGTTTCAC,GGTTTCTA,GGTTTCTT,GGTTTCTG,GGTTTCTC,  
GGTTTCGA,GGTTTCGT,GGTTTCGG,GGTTTCGC,GGTTTCCA,GGTTTCTT,GGTTTCCG,GGTTTCCC,GGTAAA,GG  
GAAT,GGGAAG,GGGAAC,GGGATA,GGGATT,GGGATG,GGGATC,GGGAGA,GGGAGT,GGG  
AGG,GGGAGC,GGGACA,GGGACT,GGGACG,GGGACC,GGGTAA,GGGTAT,GGGTAG,GGGT  
AC,GGGTAA,GGGTAT,GGGTG,GGGTTC,GGGTGA,GGGTGT,GGGTGG,GGGTGC,GGGTCA,  
GGGTCT,GGGTTC,GGGTCC,GGGGAA,GGGGAT,GGGGAG,GGGGAC,GGGGTA,GGGGTT,G  
TGGTG,GGGGTC,GGGGGA,GGGGGT,GGGGGG,GGGGGC,GGGGCA,GGGGCT,GGGGCG,GG  
GGCC,GGGCAA,GGGCAT,GGGCAG,GGGCAC,GGGCTA,GGGCTT,GGGCTG,GGGCTC,GGG  
CGA,GGGCGT,GGGCGG,GGGCGC,GGGCCA,GGGCCT,GGGCCG,GGGCCC,GGTAAA,GGT  
AAT,GGTAAG,GGTAAC,GGTATA,GGTATT,GGTATG,GGTATC,GGTAGA,GGTAGT,GG  
TAGG,GGTAGC,GGTACA,GGTACT,GGTACG,GGTACC,GGTTAA,GGTTAT,GGTTAG,GGT  
TAC,GGTTTA,GGTTTT,GGTTTG,GGTTTC,GGTTGA,GGTTGT,GGTTGG,GGTTGC,GGTT  
A,GGTTCT,GGTTTC,GGTTCC,GGTTGA,GGTTGAT,GGTTGAG,GGTTGAC,GGTTGTA,GGTTGTT,  
GGTTGT,GGTTGC,GGTTGA,GGTTGGT,GGTTGGG,GGTTGGC,GGTTGCA,GGTTGCT,GGTTGCG,  
GGTTGCC,GGTTCAA,GGTTTCAT,GGTTTCAG,GGTTTCAC,GGTTTCTA,GGTTTCTT,GGTTTCTG,GGTTTCTC,  
GGTTTCGA,GGTTTCGT,GGTTTCGG,GGTTTCGC,GGTTTCCA,GGTTTCTT,GGTTTCCG,GGTTTCCC,GGGAAA,GG

GAAT,GGGAAG,GGGAAC,GGGATA,GGGATT,GGGATG,GGGATC,GGGAGA,GGGAGT,G  
GGAGG,GGGAGC,GGGACA,GGGACT,GGGACG,GGGACC,GGGTAA,GGGTAT,GGGTAG,  
GGGTAC,GGGTTA,GGGTTT,GGGTTG,GGGTTC,GGGTGA,GGGTGT,GGGTGG,GGGTGC,G  
GGTCA,GGGTCT,GGGTCC,GGGTCC,GGGGAA,GGGGAT,GGGGAG,GGGGAC,GGGGTA,G  
GGGTT,GGGGTG,GGGGTC,GGGGGA,GGGGGT,GGGGGG,GGGGGC,GGGGCA,GGGGCT,  
GGGGCG,GGGGCC,GGGCAA,GGGCAT,GGGCAG,GGGCAC,GGGCTA,GGGCTT,GGGCTG,  
GGGCTC,GGGCGA,GGGCGT,GGGCGG,GGGCGC,GGGCCA,GGGCCT,GGGCCG,GGGCC,  
GGCAAA,GGCAAT,GGCAAG,GGCAAC,GGCATA,GGCATT,GGCATG,GGCATC,GGCAGA,  
GGCAGT,GGCAGG,GGCAGC,GGCACA,GGCACT,GGCACG,GGCACC,GGCTAA,GGCTAT,  
GGCTAG,GGCTAC,GGCTTA,GGCTTT,GGCTTG,GGCTTC,GGCTGA,GGCTGT,GGCTGG,G  
GCTGC,GGCTCA,GGCTCT,GGCTCG,GGCTCC,GGCGAA,GGCGAT,GGCGAG,GGCGAC,G  
GCGTA,GGCGTT,GGCGTG,GGCGTC,GGCGGA,GGCGGT,GGCGGG,GGCGGC,GGCGCA,G  
GCGCT,GGCGCG,GGCGCC,GGCCAA,GGCCAT,GGCCAG,GGCCAC,GGCCTA,GGCCTT,G  
GCCTG,GGCCTC,GGCCGA,GGCCGT,GGCCGG,GGCCGC,GGCCCA,GGCCCT,GGCCCG,G  
GCCCC,GCAAAA,GCAAAT,GCAAAG,GCAAAC,GCAATA,GCAATT,GCAATG,GCAATC,G  
CAAGA,GCAAGT,GCAAGG,GCAAGC,GCAACA,GCAACT,GCAACG,GCAACC,GCATAA,G  
CATAT,GCATAG,GCATAC,GCATTA,GCATTT,GCATTG,GCATTC,GCATGA,GCATGT,GC  
ATGG,GCATGC,GCATCA,GCATCT,GCATCG,GCATCC,GCAGAA,GCAGAT,GCAGAG,GC  
AGAC,GCAGTA,GCAGTT,GCAGTG,GCAGTC,GCAGGA,GCAGGT,GCAGGG,GCAGGC,GC  
AGCA,GCAGCT,GCAGCG,GCAGCC,GCACAA,GCACAT,GCACAG,GCACAC,GCACTA,GC  
ACTT,GCACTG,GCACTC,GCACGA,GCACGT,GCACGG,GCACGC,GCACCA,GCACCT,GCA  
CCG,GCACCC,GCTAAA,GCTAAT,GCTAAG,GCTAAC,GCTATA,GCTATT,GCTATG,GCTA  
TC,GCTAGA,GCTAGT,GCTAGG,GCTAGC,GCTACA,GCTACT,GCTACG,GCTACC,GCTTA  
A,GCTTAT,GCTTAG,GCTTAC,GCTTTA,GCTTTT,GCTTTG,GCTTTC,GCTTGA,GCTTGT,G  
CTTGG,GCTTGC,GCTTCA,GCTTCT,GCTTCG,GCTTCC,GCTGAA,GCTGAT,GCTGAG,GCT  
GAC,GCTGTA,GCTGTT,GCTGTG,GCTGTC,GCTGGA,GCTGGT,GCTGGG,GCTGGC,GCTG  
CA,GCTGCT,GCTGCG,GCTGCC,GCTCAA,GCTCAT,GCTCAG,GCTCAC,GCTCTA,GCTCTT  
,GCTCTG,GCTCTC,GCTCGA,GCTCGT,GCTCGG,GCTCGC,GCTCCA,GCTCCT,GCTCCG,G  
CTCCC,GCGAAA,GCGAAT,GCGAAG,GCGAAC,GCGATA,GCGATT,GCGATG,GCGATC,G  
CGAGA,GCGAGT,GCGAGG,GCGAGC,GCGACA,GCGACT,GCGACG,GCGACC,GCGTAA,G  
CGTAT,GCGTAG,GCGTAC,GCGTTA,GCGTTT,GCGTTG,GCGTTC,GCGTGA,GCGTGT,GC  
GTGG,GCGTGC,GCGTCA,GCGTCT,GCGTCG,GCGTCC,GCGGAA,GCGGAT,GCGGAG,GC  
GGAC,GCGGTA,GCGGTT,GCGGTG,GCGGTC,GCGGGA,GCGGGT,GCGGGG,GCGGGC,GC  
GGCA,GCGGCT,GCGGCG,GCGGCC,GCGCAA,GCGCAT,GCGCAG,GCGCAC,GCGCTA,GC  
GCTT,GCGCTG,GCGCTC,GCGCGA,GCGCGT,GCGCGG,GCGCGC,GCGCCA,GCGCCT,GCG  
CCG,GCGCCC,GCCAAA,GCCAAT,GCCAAG,GCCAAC,GCCATA,GCCATT,GCCATG,GCCA  
TC,GCCAGA,GCCAGT,GCCAGG,GCCAGC,GCCACA,GCCACT,GCCACG,GCCACC,GCCTA  
A,GCCTAT,GCCTAG,GCCTAC,GCCTTA,GCCTTT,GCCTTG,GCCTTC,GCCTGA,GCCTGT,G  
CCTGG,GCCTGC,GCCTCA,GCCTCT,GCCTCG,GCCTCC,GCCGAA,GCCGAT,GCCGAG,GC  
CGAC,GCCGTA,GCCGTT,GCCGTG,GCCGTC,GCCGGA,GCCGGT,GCCGGG,GCCGGC,GCC  
GCA,GCCGCT,GCCGCG,GCCGCC,GCCCAA,GCCCAT,GCCCAG,GCCCAC,GCCCTA,GCCC  
TT,GCCCTG,GCCCTC,GCCCGA,GCCCGT,GCCCGG,GCCCGC,GCCCCA,GCCCCT,GCCCC  
G,GCCCC,CAAAAA,CAAAT,CAAAG,CAAAC,CAAATA,CAAATT,CAAATG,CAAAT  
C,CAAAGA,CAAAGT,CAAAGG,CAAAGC,CAAACA,CAAAC,CAAACG,CAAACC,CAATA  
A,CAATAT,CAATAG,CAATAC,CAATTA,CAATTT,CAATTG,CAATTC,CAATGA,CAATGT,  
CAATGG,CAATGC,CAATCA,CAATCT,CAATCG,CAATCC,CAAGAA,CAAGAT,CAAGAG,  
CAAGAC,CAAGTA,CAAGTT,CAAGTG,CAAGTC,CAAGGA,CAAGGT,CAAGGG,CAAGGC,  
CAAGCA,CAAGCT,CAAGCG,CAAGCC,CAACAA,CAACAT,CAACAG,CAACAC,CAACTA,  
CAACTT,CAACTG,CAACTC,CAACGA,CAACGT,CAACGG,CAACGC,CAACCA,CAACCT,C  
AACCG,CAACCC,CATAAA,CATAAT,CATAAG,CATAAC,CATATA,CATATT,CATATG,CA  
TATC,CATAGA,CATAGT,CATAGG,CATAGC,CATACA,CATACT,CATACG,CATACC,CAT  
TAA,CATTAT,CATTAG,CATTAC,CATTTA,CATTTT,CATTTG,CATTTTC,CATTGA,CATTGT

,CATTGG,CATTGC,CATTCA,CATTCT,CATTCTG,CATTCC,CATGAA,CATGAT,CATGAG,C  
ATGAC,CATGTA,CATGTT,CATGTG,CATGTC,CATGGA,CATGGT,CATGGG,CATGGC,CA  
TGCA,CATGCT,CATGCG,CATGCC,CATCAA,CATCAT,CATCAG,CATCAC,CATCTA,CATC  
TT,CATCTG,CATCTC,CATCGA,CATCGT,CATCGG,CATCGC,CATCCA,CATCCT,CATCCG,  
CATCCC,CAGAAA,CAGAAT,CAGAAG,CAGAAC,CAGATA,CAGATT,CAGATG,CAGATC,  
CAGAGA,CAGAGT,CAGAGG,CAGAGC,CAGACA,CAGACT,CAGACG,CAGACC,CAGTAA,  
CAGTAT,CAGTAG,CAGTAC,CAGTTA,CAGTTT,CAGTTG,CAGTTC,CAGTGA,CAGTGT,C  
AGTGG,CAGTGC,CAGTCA,CAGTCT,CAGTCG,CAGTCC,CAGGAA,CAGGAT,CAGGAG,C  
AGGAC,CAGGTA,CAGGTT,CAGGTG,CAGGTC,CAGGGA,CAGGGT,CAGGGG,CAGGGC,C  
AGGCA,CAGGCT,CAGGCG,CAGGCC,CAGCAA,CAGCAT,CAGCAG,CAGCAC,CAGCTA,C  
AGCTT,CAGCTG,CAGCTC,CAGCGA,CAGCGT,CAGCGG,CAGCGC,CAGCCA,CAGCCT,CA  
GCCG,CAGCCC,CACAAA,CACAAT,CACAAG,CACAAC,CACATA,CACATT,CACATG,CAC  
ATC,CACAGA,CACAGT,CACAGG,CACAGC,CACACA,CACACT,CACACG,CACACC,CACT  
AA,CACTAT,CACTAG,CACTAC,CACTTA,CACTTT,CACTTG,CACTTC,CACTGA,CACTGT,  
CACTGG,CACTGC,CACTCA,CACTCT,CACTCG,CACTCC,CACGAA,CACGAT,CACGAG,C  
ACGAC,CACGTA,CACGTT,CACGTG,CACGTC,CACGGA,CACGGT,CACGGG,CACGGC,CA  
CGCA,CACGCT,CACGCG,CACGCC,CACCAA,CACCAT,CACCAG,CACCAC,CACCTA,CAC  
CTT,CACCTG,CACCTC,CACCGA,CACCGT,CACCGG,CACCGC,CACCCA,CACCCT,CACC  
CG,CACCCC,CTAAAA,CTAAAT,CTAAAG,CTAAAC,CTAATA,CTAATT,CTAATG,CTAAT  
C,CTAAGA,CTAAGT,CTAAGG,CTAAGC,CTAACA,CTAACT,CTAACG,CTAACC,CTATAA,  
CTATAT,CTATAG,CTATAC,CTATTA,CTATTT,CTATTG,CTATTC,CTATGA,CTATGT,CTA  
TGG,CTATGC,CTATCA,CTATCT,CTATCG,CTATCC,CTAGAA,CTAGAT,CTAGAG,CTAGA  
C,CTAGTA,CTAGTT,CTAGTG,CTAGTC,CTAGGA,CTAGGT,CTAGGG,CTAGGC,CTAGCA,  
CTAGCT,CTAGCG,CTAGCC,CTACAA,CTACAT,CTACAG,CTACAC,CTACTA,CTACTT,CT  
ACTG,CTACTC,CTACGA,CTACGT,CTACGG,CTACGC,CTACCA,CTACCT,CTACCG,CTAC  
CC,CTTAAA,CTTAAT,CTTAAG,CTTAAC,CTTATA,CTTATT,CTTATG,CTTATC,CTTAGA,  
CTTAGT,CTTAGG,CTTAGC,CTTACA,CTTACT,CTTACG,CTTACC,CTTTAA,CTTTAT,CTT  
TAG,CTTTAC,CTTTTA,CTTTTT,CTTTTG,CTTTTC,CTTTGA,CTTTGT,CTTTGG,CTTTGC,C  
TTTCA,CTTTCT,CTTTCTG,CTTTCC,CTTGAA,CTTGAT,CTTGAG,CTTGAC,CTTGTA,CTTG  
TT,CTTGTG,CTTGTC,CTTGGA,CTTGGT,CTTGGG,CTTGGC,CTTGCA,CTTGCT,CTTGCG,  
CTTGCC,CTTCAA,CTTCAT,CTTCAG,CTTCAC,CTTCTA,CTTCTT,CTTCTG,CTTCTC,CTTC  
GA,CTTCGT,CTTCGG,CTTCGC,CTTCCA,CTTCTT,CTTCCG,CTTCCC,CTGAAA,CTGAAT,  
CTGAAG,CTGAAC,CTGATA,CTGATT,CTGATG,CTGATC,CTGAGA,CTGAGT,CTGAGG,C  
TGAGC,CTGACA,CTGACT,CTGACG,CTGACC,CTGTAA,CTGTAT,CTGTAG,CTGTAC,CTG  
TTA,CTGTTT,CTGTTG,CTGTTT,CTGTGA,CTGTGT,CTGTGG,CTGTGC,CTGTCA,CTGTCT,  
CTGTCTG,CTGTCC,CTGGAA,CTGGAT,CTGGAG,CTGGAC,CTGGTA,CTGGTT,CTGGTG,CT  
GGTC,CTGGGA,CTGGGT,CTGGGG,CTGGGC,CTGGCA,CTGGCT,CTGGCG,CTGGCC,CTG  
CAA,CTGCAT,CTGCAG,CTGCAC,CTGCTA,CTGCTT,CTGCTG,CTGCTC,CTGCGA,CTGCG  
T,CTGCGG,CTGCGC,CTGCCA,CTGCCT,CTGCCG,CTGCCC,CTCAAA,CTCAAT,CTCAAG,  
CTCAAC,CTCATA,CTCATT,CTCATG,CTCATC,CTCAGA,CTCAGT,CTCAGG,CTCAGC,CT  
CACA,CTCACT,CTCACG,CTCAC,CTCTAA,CTCTAT,CTCTAG,CTCTAC,CTCTTA,CTCTT  
T,CTCTTG,CTCTTC,CTCTGA,CTCTGT,CTCTGG,CTCTGC,CTCTCA,CTCTCT,CTCTCG,CT  
CTCC,CTCGAA,CTCGAT,CTCGAG,CTCGAC,CTCGTA,CTCGTT,CTCGTG,CTCGTC,CTCG  
GA,CTCGGT,CTCGGG,CTCGGC,CTCGCA,CTCGCT,CTCGCG,CTCGCC,CTCCAA,CTCCAT  
,CTCCAG,CTCCAC,CTCCTA,CTCCTT,CTCCTG,CTCCTC,CTCCGA,CTCCGT,CTCCGG,CT  
CCGC,CTCCCA,CTCCCT,CTCCCG,CTCCCC,CGAAAA,CGAAAT,CGAAAG,CGAAAC,CGA  
ATA,CGAATT,CGAATG,CGAATC,CGAAGA,CGAAGT,CGAAGG,CGAAGC,CGAACA,CGA  
ACT,CGAACG,CGAAC,CGATAA,CGATAT,CGATAG,CGATAC,CGATTA,CGATTT,CGAT  
TG,CGATTC,CGATGA,CGATGT,CGATGG,CGATGC,CGATCA,CGATCT,CGATCG,CGATC  
C,CGAGAA,CGAGAT,CGAGAG,CGAGAC,CGAGTA,CGAGTT,CGAGTG,CGAGTC,CGAGG  
A,CGAGGT,CGAGGG,CGAGGC,CGAGCA,CGAGCT,CGAGCG,CGAGCC,CGACAA,CGACA  
T,CGACAG,CGACAC,CGACTA,CGACTT,CGACTG,CGACTC,CGACGA,CGACGT,CGACGG

,CGACGC,CGACCA,CGACCT,CGACCG,CGACCC,CGTAAA,CGTAAT,CGTAAG,CGTAAC,CGTATA,CGTATT,CGTATG,CGTATC,CGTAGA,CGTAGT,CGTAGG,CGTAGC,CGTACA,CGTACT,CGTACG,CGTACC,CGTTAA,CGTTAT,CGTTAG,CGTTAC,CGTTTA,CGTTTT,CGTTTG,CGTTTC,CGTTGA,CGTTGT,CGTTGG,CGTTGC,CGTTCA,CGTTCT,CGTTTCG,CGTTCC,CGTGAA,CGTGAT,CGTGAG,CGTGAC,CGTGTA,CGTGTT,CGTGTC,CGTGGA,CGTGGT,CGTGGG,CGTGGC,CGTGCA,CGTGCT,CGTGCG,CGTGCC,CGTCAA,CGTCAT,CGTCAG,CGTCAC,CGTCTA,CGTCTT,CGTCTG,CGTCTC,CGTCGA,CGTCGT,CGTCGG,CGTCGC,CGTCCA,CGTCCT,CGTCCG,CGTCCC,CGGAAA,CGGAAT,CGGAAG,CGGAAC,CGGATA,CGGATT,CGGATG,CGGATC,CGGAGA,CGGAGT,CGGAGG,CGGAGC,CGGACA,CGGACT,CGGACG,CGGACC,CGGTAA,CGGTAT,CGGTAG,CGGTAC,CGGTTA,CGGTTT,CGGTTG,CGG TTC,CGGTGA,CGGTGT,CGGTGG,CGGTGC,CGGTCA,CGGTCT,CGGTTCG,CGGTCC,CGGGAA,CGGGAT,CGGGAG,CGGGAC,CGGGTA,CGGGTT,CGGGTG,CGGGTC,CGGGGA,CGGGGT,CGGGGG,CGGGGC,CGGGCA,CGGGCT,CGGGCG,CGGGCC,CGGCAA,CGGCAT,CGGCAG,CGGCAC,CGGCTA,CGGCTT,CGGCTG,CGGCTC,CGGCGA,CGGCGT,CGGCGG,CGGCGC,CGGCCA,CGGCCT,CGGCCG,CGGCCC,CGCAAA,CGCAAT,CGCAAG,CGCAAC,CGCATA,CGCATT,CGCATG,CGCATC,CGCAGA,CGCAGT,CGCAGG,CGCAGC,CGCACA,CGCACT,CGCACG,CGCACCC,CGCTAA,CGCTAT,CGCTAG,CGCTAC,CGCTTA,CGCTTT,CGCTTG,CGCTTC,CGCTGA,CGCTGT,CGCTGG,CGCTGC,CGCTCA,CGCTCT,CGCTCG,CGCTCC,CGCGAA,CGCGAT,CGCGAG,CGCGAC,CGCGTA,CGCGTT,CGCGTG,CGCGTC,CGCGGA,CGCGGT,CGCGGG,CGCGGC,CGCGCA,CGCGCT,CGCGCG,CGCGCC,CGCCAA,CGCCAT,CGGCCAG,CGGCCAC,CGCCTA,CGCCTT,CGCCTG,CGCCTC,CGCCGA,CGCCGT,CGCCGG,CGCCGC,CGCCCA,CGCCCT,CGCCCG,CGCCCC,CCAAAA,CCAAAT,CCAAAG,CCAAAC,CCAATA,CCAATT,CCAATG,CCAATC,CCAAGA,CCAAGT,CCAAGG,CCAAGC,CCAACA,CCAACCT,CCAACG,CCAACC,CCATAA,CCATAT,CCATAG,CCATAC,CCATTA,CCATTT,CCATTG,CCATTC,CCATGA,CCATGT,CCATGG,CCATGC,CCATCA,CCATCT,CCATCG,CCATCC,CCAGAA,CCAGAT,CCAGAG,CCAGAC,CCAGTA,CCAGTT,CCAGTG,CCAGTC,CCAGGA,CCAGGT,CCAGGG,CCAGGC,CCAGCA,CCAGCT,CCAGCG,CCAGCC,CCACAA,CCACAT,CCACAG,CCACAC,CCACTA,CCACTT,CCACTG,CCACTC,CCACGA,CCACGT,CCACGG,CCACGC,CCACCA,CCACCT,CCACCG,CCACCC,CCTAAA,CCTAAT,CCTAAG,CCTAAC,CCTATA,CCTATT,CCTATG,CCTATC,CCTAGA,CCTAGT,CCTAGG,CCTAGC,CCTACA,CCTACT,CCTACG,CCTACC,CCTTAA,CCTTAT,CCTTAG,CCTTAC,CCTTTA,CCTTTT,CCTTTG,CCTTTC,CCTTGA,CCTTGT,CCTTGG,CCTTGC,CCTTCA,CCTTCT,CCTTCG,CCTTCC,CCTGAA,CCTGAT,CCTGAG,CCTGAC,CCTGTA,CCTGTT,CCTGTG,CCTGTC,CCTGGA,CCTGGT,CCTGGG,CCTGGC,CCTGCA,CCTGCT,CCTGCG,CCTGCC,CCTCAA,CCTCAT,CCTCAG,CCTCAC,CCTCTA,CCTCTT,CCTCTG,CCTCTC,CCTCGA,CCTCGT,CCTCGG,CCTCGC,CCTCCA,CCTCCT,CCTCCG,CCTCCC,CCGAAA,CCGAAT,CCGAAG,CCGAAC,CCGATA,CCGATT,CCGATG,CCGATC,CCGAGA,CCGAGT,CCGAGG,CCGAGC,CCGACA,CCGACT,CCGACG,CCGACC,CCGTAA,CCGTAT,CCGTAG,CCGTAC,CCGTTA,CCGTTT,CCGTTG,CCGTTC,CCGTGA,CCGTGT,CCGTGG,CCGTGC,CCGTCA,CCGTCT,CCGTTCG,CCGTCC,CCGGAA,CCGGAT,CCGGAG,CCGGAC,CCGGTA,CCGGTT,CCGGTG,CCGGTC,CCGGGA,CCGGGT,CCGGGG,CCGGGC,CCGGCA,CCGGCT,CCGGCG,CCGGCC,CCGCAA,CCGCAT,CCGCAG,CCGCAC,CCGCTA,CCGCTT,CCGCTG,CCGCTC,CCGCGA,CCGCGT,CCGCGG,CCGCGC,CCGCCA,CCGCCT,CCGCCG,CCGCCC,CCAAAA,CCCAAT,CCCAAG,CCCAAC,CCCATA,CCCATT,CCCATG,CCCATC,CCCAGA,CCCAGT,CCCAGG,CCCAGC,CCCACA,CCCCTT,CCCACG,CCCACC,CCCTAA,CCCTAT,CCCTAG,CCCTAC,CCCTTA,CCCTTT,CCCTTG,CCCTTC,CCCTGA,CCCTGT,CCCTGG,CCCTGC,CCCTCA,CCCTCT,CCCTCG,CCCTCC,CCCGAA,CCCGAT,CCCGAG,CCCGAC,CCCGTA,CCCGTT,CCCGTG,CCCGTC,CCCGGA,CCCGGT,CCCGGG,CCCGGC,CCCGCA,CCCGCT,CCCGCG,CCCGCC,CCCCAA,CCCCAT,CCCCAG,CCCCAC,CCCCTA,CCCCTT,CCCCTG,CCCCTC,CCCCGA,CCCCGT,CCCCGG,CCCCGC,CCCCCA,CCCCCT,CCCCCG,CCCCCC,sd,dfa,hurst,sampen,ac,rvntsl,ac\_200,ac\_300,label
